# Supplementary material for: X-ray Ptychographic Imaging and Spectroscopic Studies of Plasma-Treated Plastic Films
Source: MDPI journal article supplement (doi:10.3390/polym14132528), 2022-06-21
Supplement: s1 [file s1]

## X-ray ptychographic imaging and spectroscopic studies of plasma-treated plastic films

Mehdi Ravandeh<sup>1</sup>, Masoud Mehrjoo<sup>\*2</sup>, Konstantin Kharitonov<sup>2</sup>, Jan Schäfer<sup>1</sup>, Antje Quade<sup>1</sup>, Bruno Honnorat<sup>1</sup>, Mabel Ruiz-Lopez<sup>2</sup>, Barbara Keitel<sup>2</sup>, Svea Kreis<sup>2</sup>, Rui Pan<sup>2</sup>, Seung-gi Gang<sup>2</sup>, Kristian Wende<sup>\*1</sup>, Elke Plönjes<sup>2</sup>

<sup>1</sup>Leibniz Institute for Plasma Science and Technology, Felix-Hausdorff-Straße 2, 17489 Greifswald, Germany

<sup>2</sup>Deutsches Elektronen-Synchrotron DESY, Notkestraße 85, 22607 Hamburg, Germany

### Supplementary information

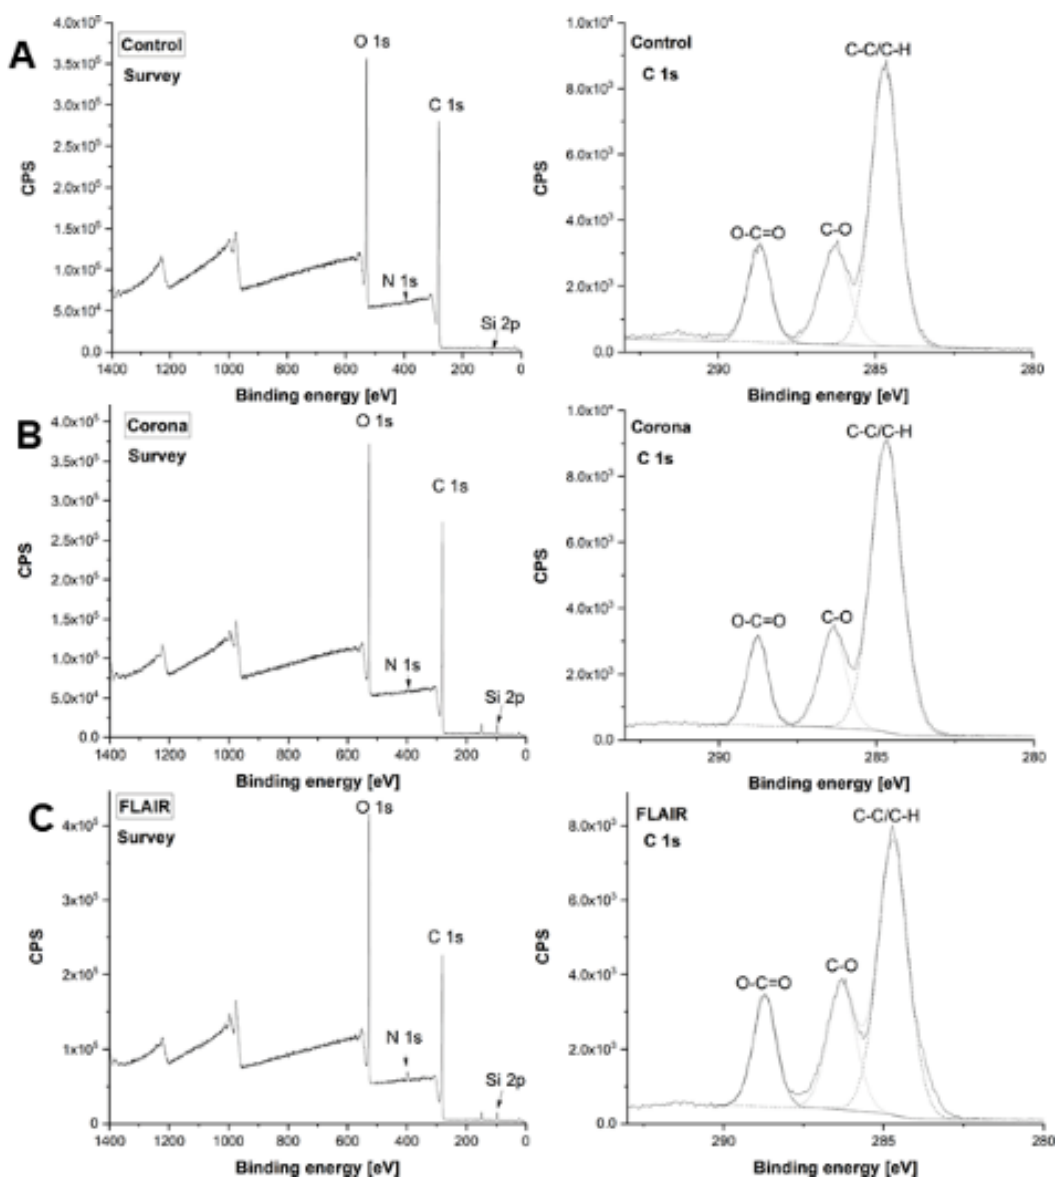

Figure S1. XPS Spectra (counts per second (CPS) vs. binding energy, B.E.), survey and C 1s for (A) control PET film, (B) corona treated PET film, and (C) FLAIR treated PET film
